# Supplementary material
Source: Springer Nature journal article supplement (https://www.springermedizin.de/resource/supplementary/13024_2010_167_MOESM5_ESM.pdf/9643568)

**Normal**

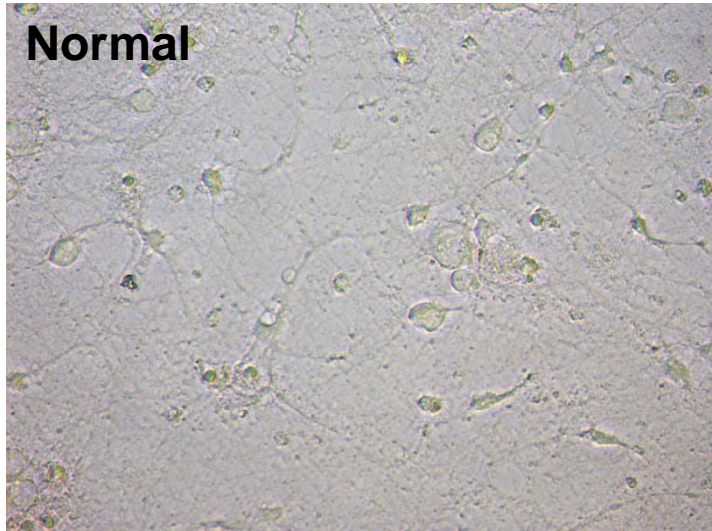

**OGD 12 h**

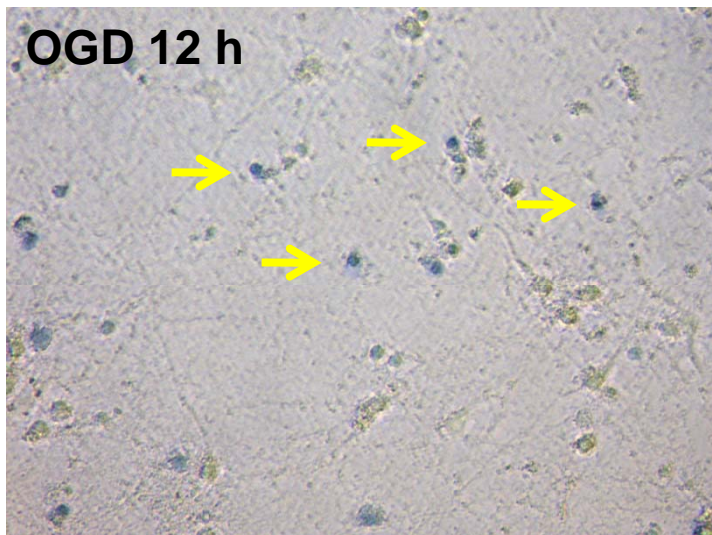

Supplement: MOESM5 [file 9643568]
